# Supplementary material
Source: PubMed Central journal article supplement (PMC8488769)
Supplement: ONCO-26-e1742-s001.pdf [file ONCO-26-e1742-s001.pdf]

Supplemental Tables for:  
Immune-related adverse events as clinical biomarkers in metastatic renal cell carcinoma patients treated with immune checkpoint inhibitors  
Mehmet Bilen et al.

**Supplemental Table 1:** UVA of association between severe irAEs\* and clinical outcomes

| Variable                                          | Level       | OS                  |         | PFS                 |         | CB                  |         |
|---------------------------------------------------|-------------|---------------------|---------|---------------------|---------|---------------------|---------|
|                                                   |             | HR (CI)             | p-value | HR (CI)             | p-value | OR (CI)             | p-value |
| <b>Systemic Corticosteroid for irAE treatment</b> | Yes<br>n=41 | 0.99<br>(0.41-2.37) | 0.983   | 1.11<br>(0.59-2.06) | 0.751   | 1.69<br>(0.59-4.89) | 0.331   |
|                                                   | No<br>n=24  | 1                   |         | 1                   |         | 1                   |         |
| <b>Grade 3 or 4 irAE</b>                          | Yes<br>n=17 | 2.22<br>(0.91-5.45) | 0.081   | 1.21<br>(0.62-2.35) | 0.582   | 0.69<br>(0.21-2.26) | 0.544   |
|                                                   | No<br>n=48  | 1                   |         | 1                   |         | 1                   |         |

\*Severe irAEs defined as Grade 3 or 4 per CTCAEv5.0

**Supplemental Table 2:** Univariate association (UVA) of sites of irAEs and clinical outcomes

| Variable                         | OS                  |         | PFS                 |         | CB                    |         |
|----------------------------------|---------------------|---------|---------------------|---------|-----------------------|---------|
|                                  | HR (CI)             | p-value | HR (CI)             | p-value | OR (CI)               | p-value |
| <b>Any irAE</b><br>n=66          | 0.51<br>(0.32-0.82) | 0.006*  | 0.60<br>(0.42-0.84) | 0.003*  | 2.36<br>(1.26-4.41)   | 0.007*  |
| <b>Pulmonary irAE</b><br>n=6     | 0.74<br>(0.18-3.03) | 0.680   | 1.26<br>(0.56-2.86) | 0.573   | 1.88<br>(0.31-11.5)   | 0.497   |
| <b>Dermatologic irAE</b><br>n=20 | 0.61<br>(0.28-1.32) | 0.207   | 0.63<br>(0.36-1.09) | 0.101   | 1.80<br>(0.69-4.69)   | 0.233   |
| <b>Endocrine irAE</b><br>n=26    | 0.26<br>(0.09-0.70) | 0.008*  | 0.46<br>(0.26-0.79) | 0.005*  | 3.03<br>(1.23-7.42)   | 0.016*  |
| <b>Thyroid irAE</b><br>n=17      | 0.09<br>(0.01-0.65) | 0.017*  | 0.28<br>(0.13-0.60) | 0.001*  | 11.03<br>(2.44-49.79) | 0.002*  |
| <b>Adrenal irAE</b><br>n=8       | 0.50<br>(0.12-2.04) | 0.336   | 0.65<br>(0.27-1.59) | 0.346   | 1.67<br>(0.36-7.68)   | 0.510   |
| <b>Pituitary irAE</b><br>n=4     | 0.97<br>(0.24-3.94) | 0.966   | 2.43<br>(0.89-6.62) | 0.084   | 0.00<br>(0.00-1)      | 0.982   |
| <b>Renal irAE</b><br>n=7         | 1.31<br>(0.48-3.57) | 0.597   | 1.02<br>(0.45-2.30) | 0.967   | 1.24<br>(0.24-6.30)   | 0.797   |
| <b>MSK irAE</b><br>n=8           | 1.11<br>(0.41-3.01) | 0.845   | 0.68<br>(0.28-1.66) | 0.401   | 2.12<br>(0.49-9.13)   | 0.315   |
| <b>GI irAE</b><br>n=21           | 0.40<br>(0.16-0.99) | 0.047*  | 0.61<br>(0.35-1.06) | 0.079   | 1.99<br>(0.77-5.12)   | 0.155   |
| <b>Hepatic irAE</b><br>n=14      | 0.54<br>(0.20-1.47) | 0.230   | 0.69<br>(0.35-1.35) | 0.280   | 2.07<br>(0.65-6.58)   | 0.218   |
| <b>Pancreatic irAE</b><br>n=5    | 0.30<br>(0.04-2.19) | 0.237   | 0.45<br>(0.14-1.41) | 0.171   | 1.88<br>(0.31-11.50)  | 0.497   |

|                                 |                     |       |                     |       |                     |       |
|---------------------------------|---------------------|-------|---------------------|-------|---------------------|-------|
| <b>Colon irAE</b><br><b>n=2</b> | 0.00<br>(0.00--)    | 0.981 | 0.29<br>(0.04-2.04) | 0.212 | 1889561<br>(0.00-1) | 0.987 |
| <b>Other irAE</b><br><b>n=4</b> | 1.23<br>(0.39-3.88) | 0.729 | 1.71<br>(0.63-4.64) | 0.295 | 0.00<br>(0.00-1)    | 0.982 |

\*Statistical significance at alpha < 0.05

**Supplemental Table 3:** Univariate analysis (UVA) using extended Cox model for association of irAEs and overall survival (OS)

| Covariate             | Level       | OS                  |               |
|-----------------------|-------------|---------------------|---------------|
|                       |             | HR (CI)             | p-value       |
| <b>Any irAE</b>       | Yes<br>n=66 | 0.79 (0.49-1.28)    | 0.338         |
|                       | No<br>n=134 | -                   |               |
| <b>Endocrine irAE</b> | Yes<br>n=26 | 0.372 (0.14-1.02)   | 0.054         |
|                       | No<br>n=174 | -                   |               |
| <b>Thyroid irAE</b>   | Yes<br>n=17 | 0.133 (0.019-0.958) | <b>0.045*</b> |
|                       | No<br>n=183 | 1                   |               |
